# Supplementary material
Source: PubMed Central journal article supplement (PMC3783246)
Supplement: supp_mct185_mct185supp.pdf [file supp_mct185_mct185supp.pdf]

# SUPPLEMENTARY DATA

TABLE S1. list of sampled taxa, their 2C and Cx genome sizes, life form, ephemeroïd phenology presence and storage organ type.

| APG Family       | Species                                  | Genome size 2C [Mbp] | Ploidy level | Genome size Cx [Mbp] | CV genome size [%] | Used standard        | Ratio | Life-form | G/N | Node number | Ephemeroïd phenology | Storage organ | Sample origin                       |
|------------------|------------------------------------------|----------------------|--------------|----------------------|--------------------|----------------------|-------|-----------|-----|-------------|----------------------|---------------|-------------------------------------|
| Aristolochiaceae | <i>Aristolochia clematitis</i>           | 757                  | 2            | 379                  | 0.34               | Ipomoea quamoclit    | 0.612 | Hkf       | N   | 1           |                      |               | 49°14'0.973"N, 16°34'11.917"E       |
| Aristolochiaceae | <i>Aristolochia fimbriata</i> *          | 880                  | 2            | 440                  |                    |                      |       | Gf        | G   | 1           | no                   | tuber         |                                     |
| Aristolochiaceae | <i>Aristolochia rotunda</i> *            | 582                  | 2            | 291                  |                    |                      |       | Gf        | G   | 1           | no                   | tuber         |                                     |
| Ranunculaceae    | <i>Ranunculus bulbosus</i> *             | 10234                | 2            | 5117                 |                    |                      |       | Gf        | G   | 2           | no                   | tuber         |                                     |
| Ranunculaceae    | <i>Ranunculus polyanthemus</i>           | 11193                | 2            | 5596                 | 0.73               | Pisum sativum        | 1.427 | Hkf       | N   | 2           |                      |               | Botanical garden Masaryk Univ. Brno |
| Ranunculaceae    | <i>Ranunculus sardous</i> *              | 6895                 | 2            | 3448                 |                    |                      |       | Tf        | N   | 2           |                      |               |                                     |
| Ranunculaceae    | <i>Anemone narcissiflora</i> *           | 17551                | 2            | 8776                 |                    |                      |       | Gf        | G   | 3           | no                   | rhizome       |                                     |
| Ranunculaceae    | <i>Hepatica nobilis</i>                  | 30348                | 2            | 15174                | 0.83               | Vicia faba           | 1.304 | Hkf       | N   | 3           |                      |               | 49°14'4.665"N, 16°40'27.691"E       |
| Ranunculaceae    | <i>Anemone apennina</i> *                | 26454                | 2            | 13227                |                    |                      |       | Gf        | G   | 4           | yes                  | rhizome       |                                     |
| Ranunculaceae    | <i>Anemone blanda</i>                    | 27039                | 2            | 13520                |                    | Haemanthus albilfos  | 0.415 | Gf        | G   | 4           | yes                  | rhizome       | 37°10'23.862"N, 31°55'32.400"E      |
| Ranunculaceae    | <i>Anemone coronaria</i> *               | 21874                | 2            | 10937                |                    |                      |       | Gf        | G   | 4           | yes                  | rhizome       |                                     |
| Ranunculaceae    | <i>Anemone hortensis</i> *               | 23495                | 2            | 11748                |                    |                      |       | Gf        | G   | 4           | yes                  | rhizome       |                                     |
| Ranunculaceae    | <i>Anemone nemorosa</i> *                | 37017                | 4            | 9254                 |                    |                      |       | Gf        | G   | 4           | yes                  | rhizome       |                                     |
| Ranunculaceae    | <i>Anemone ranunculoides</i> *           | 32473                | 4            | 8118                 |                    |                      |       | Gf        | G   | 4           | yes                  | rhizome       |                                     |
| Ranunculaceae    | <i>Anemone sylvestris</i>                | 15798                | 2            | 7899                 | 1.42               | Pisum sativum        | 2.015 | Hkf       | N   | 4           |                      |               | 49°13'8.777"N, 16°30'40.05"E        |
| Ranunculaceae    | <i>Anemone virginiana</i> *              | 17457                | 2            | 8729                 |                    |                      |       | Hkf       | N   | 4           |                      |               |                                     |
| Ranunculaceae    | <i>Isopyrum thalictroides</i> *          | 854                  | 2            | 427                  |                    |                      |       | Gf        | G   | 5           | yes                  | rhizome       |                                     |
| Ranunculaceae    | <i>Thalictrum simplex ssp. galioides</i> | 2167                 | 4            | 542                  | 1.02               | Pisum sativum        | 0.276 | Hkf       | N   | 5           |                      |               | Botanical garden Masaryk Univ. Brno |
| Berberidaceae    | <i>Berberis vulgaris</i>                 | 2681                 | 2            | 1341                 | 0.23               | Solanum lycopersicum | 1.580 | Ff        | N   | 6           |                      |               | 49°13'0.604"N, 16°40'12.846"E       |
| Berberidaceae    | <i>Epimedium alpinum</i> *               | 8010                 | 2            | 4005                 |                    |                      |       | Gf        | G   | 6           | no                   | rhizome       |                                     |
| Berberidaceae    | <i>Jeffersonia diphylla</i> *            | 3445                 | 2            | 1722                 |                    |                      |       | Gf        | G   | 6           | yes                  | rhizome       |                                     |
| Berberidaceae    | <i>Jeffersonia dubia</i> *               | 2691                 | 2            | 1346                 |                    |                      |       | Gf        | G   | 6           | yes                  | rhizome       |                                     |
| Berberidaceae    | <i>Nandina domestica</i> *               | 4303                 | 2            | 2152                 |                    |                      |       | Ff        | N   | 6           |                      |               |                                     |
| Berberidaceae    | <i>Podophyllum emodi</i> *               | 28762                | 2            | 14381                |                    |                      |       | Gf        | G   | 6           | yes                  | rhizome       |                                     |
| Papaveraceae     | <i>Dicranostigma franchetianum</i> *     | 1565                 | 2            | 783                  |                    |                      |       | Hkf       | N   | 7           |                      |               |                                     |
| Papaveraceae     | <i>Chelidonium majus</i>                 | 1967                 | 2            | 984                  | 0.72               | Carex acutiformis    | 2.459 | Hkf       | N   | 7           |                      |               | 49°12'38.500"N, 16°34'43.733"E      |
| Papaveraceae     | <i>Sanguinaria canadensis</i>            | 1942                 | 2            | 971                  | 0.91               | Bellis perennis      | 0.628 | Gf        | G   | 7           | yes                  | rhizome       | www.lukon-glads.cz                  |
| Fumariaceae      | <i>Corydalis cava</i> *                  | 1870                 | 2            | 935                  |                    |                      |       | Gf        | G   | 8           | yes                  | tuber         |                                     |
| Fumariaceae      | <i>Corydalis intermedia</i> *            | 1395                 | 2            | 697                  |                    |                      |       | Gf        | G   | 8           | yes                  | tuber         |                                     |

|                |                                                 |       |   |      |      |                      |       |     |   |    |     |         |                                     |
|----------------|-------------------------------------------------|-------|---|------|------|----------------------|-------|-----|---|----|-----|---------|-------------------------------------|
| Fumariaceae    | <i>Corydalis lutea</i>                          | 1179  | 4 | 295  | 0.92 | Carex acutiformis    | 1.474 | Hkf | N | 8  |     |         | Botanical garden Masaryk Univ. Brno |
| Fumariaceae    | <i>Corydalis pumila</i> *                       | 1173  | 2 | 587  |      |                      |       | Gf  | G | 8  | yes | tuber   |                                     |
| Fumariaceae    | <i>Corydalis solida</i> *                       | 1191  | 2 | 595  |      |                      |       | Gf  | G | 8  | yes | tuber   |                                     |
| Vitaceae       | <i>Parthenocissus himalayensis</i>              | 3182  | 4 | 795  | 0.21 | Solanum lycopersicum | 1.875 | Gf  | G | 9  | no  | tuber   | Botanical garden Masaryk Univ. Brno |
| Vitaceae       | <i>Parthenocissus tricuspidata</i> <sup>+</sup> | 1027  | 2 | 514  |      |                      |       | Ff  | N | 9  |     |         |                                     |
| Oxalidaceae    | <i>Oxalis acetosella</i> <sup>+</sup>           | 5575  | 2 | 2788 |      |                      |       | Gf  | G | 10 | no  | rhizome |                                     |
| Oxalidaceae    | <i>Oxalis corniculata</i> var. <i>repens</i>    | 1918  | 6 | 320  | 0.21 | Solanum lycopersicum | 1.130 | Hkf | N | 10 |     |         | 49°15'2.705"N, 16°34'24.511"E       |
| Oxalidaceae    | <i>Oxalis corymbosa</i> *                       | 719   | 2 | 359  |      |                      |       | Gf  | G | 10 | no  | bulb    |                                     |
| Oxalidaceae    | <i>Oxalis dillenii</i> <sup>+</sup>             | 978   | 4 | 245  |      |                      |       | Tf  | N | 10 |     |         |                                     |
| Oxalidaceae    | <i>Oxalis linearis</i> <sup>+</sup>             | 2249  | 2 | 1125 |      |                      |       | Gf  | G | 10 | no  | bulb    |                                     |
| Oxalidaceae    | <i>Oxalis megalorrhiza</i> <sup>+</sup>         | 796   | 2 | 398  |      |                      |       | Gf  | G | 10 | no  | root    |                                     |
| Oxalidaceae    | <i>Oxalis pes-caprae</i> <sup>+</sup>           | 1340  | 4 | 335  |      |                      |       | Gf  | G | 10 | no  | bulb    |                                     |
| Oxalidaceae    | <i>Oxalis spiralis</i> <sup>+</sup>             | 1175  | 2 | 587  |      |                      |       | Gf  | G | 10 | no  | root    |                                     |
| Oxalidaceae    | <i>Oxalis vulcanicola</i> <sup>+</sup>          | 867   | 2 | 434  |      |                      |       | Gf  | G | 10 | no  | root    |                                     |
| Passifloraceae | <i>Passiflora edulis</i> <sup>+</sup>           | 3115  | 2 | 1557 |      |                      |       | Hkf | N | 11 |     |         |                                     |
| Passifloraceae | <i>Passiflora quadrangularis</i> *              | 4277  | 2 | 2139 |      |                      |       | Gf  | G | 11 | no  | root    |                                     |
| Euphorbiaceae  | <i>Mercurialis annua</i>                        | 2557  | 4 | 639  | 1.44 | Solanum lycopersicum | 1.507 | Tf  | N | 12 |     |         | 49°11'36.763"N, 16°33'25.906"E      |
| Euphorbiaceae  | <i>Mercurialis huetii</i> <sup>+</sup>          | 1399  | 2 | 700  |      |                      |       | Tf  | N | 12 |     |         |                                     |
| Euphorbiaceae  | <i>Mercurialis perennis</i> *                   | 6298  | 8 | 787  |      |                      |       | Gf  | G | 12 | no  | rhizome |                                     |
| Euphorbiaceae  | <i>Euphorbia</i> cf. <i>apios</i>               | 2870  | 4 | 717  | 1.11 | Solanum lycopersicum | 1.691 | Gf  | G | 13 | no  | root    | 36°54'56.984"N, 30°3'31.444"E       |
| Euphorbiaceae  | <i>Euphorbia helioscopia</i>                    | 1750  | 4 | 438  | 1.37 | Carex acutiformis    | 2.188 | Tf  | N | 13 |     |         | 49°12'39.419"N, 16°34'46.703"E      |
| Fabaceae       | <i>Lathyrus annuus</i> <sup>+</sup>             | 12538 | 2 | 6269 |      |                      |       | Tf  | N | 14 |     |         |                                     |
| Fabaceae       | <i>Lathyrus heterophyllus</i> <sup>+</sup>      | 17995 | 2 | 8998 |      |                      |       | Hkf | N | 14 |     |         |                                     |
| Fabaceae       | <i>Lathyrus latifolius</i>                      | 15053 | 2 | 7526 | 1.54 | Pisum sativum        | 1.920 | Hkf | N | 14 |     |         | 49°13'15.118"N, 16°40'10.245"E      |
| Fabaceae       | <i>Lathyrus tuberosus</i> *                     | 12058 | 2 | 6029 |      |                      |       | Gf  | G | 14 | no  | tuber   |                                     |
| Fabaceae       | <i>Lathyrus aphaca</i> <sup>+</sup>             | 9037  | 2 | 4519 |      |                      |       | Tf  | N | 15 |     |         |                                     |
| Fabaceae       | <i>Lathyrus laxiflorus</i>                      | 16419 | 2 | 8210 | 1.16 | Pisum sativum        | 2.094 | Gf  | G | 15 | no  | root    | 37°48'4.13"N, 30°51'36.80"E         |
| Cucurbitaceae  | <i>Bryonia alba</i> *                           | 5827  | 2 | 2913 |      |                      |       | Gf  | G | 16 | no  | tuber   |                                     |
| Cucurbitaceae  | <i>Bryonia dioica</i> *                         | 5522  | 2 | 2761 |      |                      |       | Gf  | G | 16 | no  | tuber   |                                     |
| Cucurbitaceae  | <i>Bryonia verrucosa</i> *                      | 4504  | 2 | 2252 |      |                      |       | Gf  | G | 16 | no  | tuber   |                                     |
| Cucurbitaceae  | <i>Ecballium elaterium</i> <sup>+</sup>         | 2442  | 2 | 1221 |      |                      |       | Gf  | G | 16 | no  | tuber   |                                     |
| Cucurbitaceae  | <i>Echinocystis lobata</i>                      | 1319  | 4 | 330  | 0.51 | Solanum lycopersicum | 0.778 | Tf  | N | 16 |     |         | 49°12'44.587"N, 16°34'42.654"E      |
| Cucurbitaceae  | <i>Luffa cylindrica</i> <sup>+</sup>            | 1663  | 2 | 832  |      |                      |       | Tf  | N | 16 |     |         |                                     |
| Cucurbitaceae  | <i>Trichosanthes anguina</i> <sup>+</sup>       | 2152  | 2 | 1076 |      |                      |       | Tf  | N | 16 |     |         |                                     |
| Begoniaceae    | <i>Begonia dregei</i> <sup>+</sup>              | 1291  | 2 | 646  |      |                      |       | Gf  | G | 17 |     |         |                                     |

|                  |                                         |      |    |      |      |                      |       |     |   |    |     |         |                                     |
|------------------|-----------------------------------------|------|----|------|------|----------------------|-------|-----|---|----|-----|---------|-------------------------------------|
| Begoniaceae      | <i>Begonia grandis</i> *                | 1086 | 2  | 543  |      |                      |       | Gf  | G | 17 | no  | tuber   |                                     |
| Begoniaceae      | <i>Begonia luxurians</i> *              | 626  | 2  | 313  |      |                      |       | Hkf | N | 17 |     |         |                                     |
| Begoniaceae      | <i>Begonia socotrana</i> *              | 1001 | 2  | 501  |      |                      |       | Gf  | G | 17 |     |         |                                     |
| Geraniaceae      | <i>Geranium columbinum</i>              | 1398 | 2  | 699  | 1.56 | Solanum lycopersicum | 0.824 | Tf  | N | 18 |     |         | 49°12'39.327"N, 16°34'46.639"E      |
| Geraniaceae      | <i>Geranium sanguineum</i>              | 7480 | 8  | 935  | 1.05 | Bellis perennis      | 2.421 | Hkf | N | 18 |     |         | 49°13'1.686"N, 16°40'11.906"E       |
| Geraniaceae      | <i>Geranium tuberosum</i> *             | 2424 | 4  | 606  |      |                      |       | Gf  | G | 18 | no  | tuber   |                                     |
| Brassicaceae     | <i>Cardamine bulbifera</i> *            | 3685 | 12 | 307  |      |                      |       | Gf  | G | 19 | yes | rhizome | Published as Dentaria bulbifera     |
| Brassicaceae     | <i>Cardamine impatiens</i>              | 356  | 2  | 178  | 1.47 | Carex acutiformis    | 0.446 | Tf  | N | 19 |     |         | 49°12'30.267"N, 16°34'38.077"E      |
| Tropaeolaceae    | <i>Tropaeolum majus</i>                 | 4615 | 4  | 1154 | 1.77 | Pisum sativum        | 0.589 | Hkf | N | 20 |     |         | Botanical garden Masaryk Univ. Brno |
| Tropaeolaceae    | <i>Tropaeolum tuberosum</i>             | 2477 | 2  | 1239 | 1.79 | Pisum sativum        | 0.316 | Gf  | G | 20 | no  | tuber   | www.lukon-glads.cz                  |
| Balsaminaceae    | <i>Impatiens glandulifera</i> *         | 1858 | 2  | 929  |      |                      |       | Tf  | N | 21 |     |         |                                     |
| Balsaminaceae    | <i>Impatiens omeiensis</i> *            | 6378 | 6  | 1063 |      |                      |       | Gf  | G | 21 | no  | tuber   |                                     |
| Balsaminaceae    | <i>Impatiens parviflora</i>             | 3748 | 4  | 937  | 1.44 | Pisum sativum        | 0.478 | Tf  | N | 21 |     |         | 49°15'3.09"N, 16°34'25.315"E        |
| Boraginaceae     | <i>Symphytum officinale</i>             | 3809 | 6  | 635  | 0.78 | Solanum lycopersicum | 2.245 | Hkf | N | 22 |     |         | 49°14'57.650"N, 16°34'21.753"E      |
| Boraginaceae     | <i>Symphytum tuberosum</i> *            | 5369 | 8  | 671  |      |                      |       | Gf  | G | 22 | no  | tuber   |                                     |
| Apocynaceae      | <i>Vinca herbacea</i>                   | 1577 | 2  | 789  | 0.61 | Bellis perennis      | 0.510 | Gf  | G | 23 | no  | root    | 38°3'15.029"N, 32°58'33.413"E       |
| Apocynaceae      | <i>Vinca minor</i>                      | 1340 | 2  | 670  | 1.32 | Solanum lycopersicum | 0.790 | Chf | N | 23 |     |         | 49°13'5.891"N, 16°40'42.984"E       |
| Apocynaceae      | <i>Asclepias syriaca</i> *              | 822  | 2  | 411  |      |                      |       | Gf  | G | 24 | no  | rhizome |                                     |
| Apocynaceae      | <i>Vincetoxicum hirundinaria</i> *      | 646  | 2  | 323  |      |                      |       | Hkf | N | 24 |     |         |                                     |
| Lamiaceae        | <i>Phlomis russeliana</i>               | 9244 | 4  | 2311 | 0.21 | Pisum sativum        | 1.179 | Hkf | N | 25 |     |         | Botanical garden Masaryk Univ. Brno |
| Lamiaceae        | <i>Phlomis tuberosa</i> *               | 3965 | 2  | 1982 |      |                      |       | Gf  | G | 25 | no  | rhizome |                                     |
| Lamiaceae        | <i>Stachys affinis</i>                  | 2796 | 2  | 1398 | 0.40 | Bellis perennis      | 0.905 | Gf  | G | 26 | no  | tuber   | Cultivated plants of unknown origin |
| Lamiaceae        | <i>Stachys sylvatica</i>                | 2273 | 2  | 1136 | 1.38 | Bellis perennis      | 0.736 | Hkf | N | 26 |     |         | 49°16'38.592"N, 16°38'5.102"E       |
| Scrophulariaceae | <i>Scrophularia nodosa</i> *            | 1352 | 2  | 676  |      |                      |       | Gf  | G | 27 | no  | rhizome |                                     |
| Scrophulariaceae | <i>Scrophularia umbrosa ssp. neesii</i> | 2401 | 4  | 600  | 0.92 | Solanum lycopersicum | 1.415 | Hkf | N | 27 |     |         | 49°16'18.224"N, 16°38'25.562"E      |
| Scrophulariaceae | <i>Scrophularia vernalis</i>            | 681  | 2  | 340  | 0.43 | Solanum lycopersicum | 0.401 | Hkf | N | 27 |     |         | 49°13'48.33"N 16°40'44.53"E         |
| Solanaceae       | <i>Datura innoxia</i> *                 | 4443 | 2  | 2221 |      |                      |       | Gf  | G | 28 | no  | root    |                                     |
| Solanaceae       | <i>Datura quercifolia</i> *             | 3374 | 2  | 1687 |      |                      |       | Tf  | N | 28 |     |         |                                     |
| Solanaceae       | <i>Datura stramonium</i>                | 3807 | 2  | 1903 | 0.48 | Pisum sativum        | 0.485 | Tf  | N | 28 |     |         | 49°12'39.333"N, 16°34'46.775"E      |
| Solanaceae       | <i>Solanum etuberosum</i> *             | 1516 | 2  | 758  |      |                      |       | Chf | N | 29 |     |         |                                     |
| Solanaceae       | <i>Solanum lycopersicum</i> *           | 1697 | 2  | 848  |      |                      |       | Tf  | N | 29 |     |         |                                     |
| Solanaceae       | <i>Solanum pinnatisectum</i> *          | 1516 | 2  | 758  |      |                      |       | Gf  | G | 29 | no  | tuber   |                                     |
| Solanaceae       | <i>Solanum tuberosum</i> *              | 3148 | 4  | 787  |      |                      |       | Gf  | G | 29 | no  | tuber   |                                     |
| Convolvulaceae   | <i>Ipomoea batatas</i>                  | 2769 | 4  | 692  | 2.12 | Solanum lycopersicum | 1.632 | Gf  | G | 30 | no  | tuber   | Cultivated plants of unknown origin |
| Convolvulaceae   | <i>Ipomoea quamoclit</i> *              | 1238 | 2  | 619  |      |                      |       | Tf  | N | 30 |     |         |                                     |

|                |                                               |       |   |       |      |                      |       |     |   |    |     |         |                                     |
|----------------|-----------------------------------------------|-------|---|-------|------|----------------------|-------|-----|---|----|-----|---------|-------------------------------------|
| Convolvulaceae | <i>Ipomoea tiliacea</i> <sup>+</sup>          | 3912  | 4 | 978   |      |                      |       | Gf  | G | 30 | no  | tuber   |                                     |
| Convolvulaceae | <i>Ipomoea trifida</i> <sup>+</sup>           | 1663  | 2 | 832   |      |                      |       | Gf  | G | 30 | no  | tuber   |                                     |
| Adoxaceae      | <i>Adoxa moschatellina</i> <sup>*</sup>       | 40213 | 2 | 20106 |      |                      |       | Gf  | G | 31 | yes | rhizome |                                     |
| Adoxaceae      | <i>Sambucus ebulus</i>                        | 21246 | 2 | 10623 | 0.72 | Epipremnum aureum    | 2.719 | Hkf | N | 31 |     |         | 49°13'4.89"N, 16°40'9.50"E          |
| Adoxaceae      | <i>Sambucus nigra</i>                         | 24053 | 2 | 12026 | 1.49 | Ruscus aculeatus     | 1.194 | Ff  | N | 31 |     |         | 49°13'6.60"N, 16°40'48.55"E         |
| Adoxaceae      | <i>Sambucus racemosa</i> <sup>+</sup>         | 20636 | 2 | 10318 |      |                      |       | Ff  | N | 31 |     |         |                                     |
| Valerianaceae  | <i>Valeriana dioica</i> <sup>+</sup>          | 2978  | 2 | 1489  |      |                      |       | Hkf | N | 32 |     |         |                                     |
| Valerianaceae  | <i>Valeriana officinalis</i>                  | 2654  | 2 | 1327  | 0.35 | Solanum lycopersicum | 1.564 | Hkf | N | 32 |     |         | 49°13'35.072"N, 17°38'45.718"E      |
| Valerianaceae  | <i>Valeriana tuberosa</i>                     | 3232  | 2 | 1616  | 0.97 | Solanum lycopersicum | 1.905 | Gf  | G | 32 | yes | tuber   | 41°43'38.306"N, 15°47'47.871"E      |
| Apiaceae       | <i>Hacquetia epipactis</i> <sup>*</sup>       | 2692  | 2 | 1346  |      |                      |       | Gf  | G | 33 | yes | rhizome |                                     |
| Apiaceae       | <i>Sanicula europaea</i>                      | 2108  | 2 | 1054  | 0.31 | Solanum lycopersicum | 1.243 | Hkf | N | 33 |     |         | 49°13'16.01"N, 16°40'31.943"E       |
| Asteraceae     | <i>Doronicum austriacum</i>                   | 7080  | 2 | 3540  | 3.59 | Bellis perennis      | 2.291 | Hkf | N | 34 |     |         | 49°30'51.115"N, 18°22'49.561"E      |
| Asteraceae     | <i>Doronicum hungaricum</i> <sup>*</sup>      | 7525  | 2 | 3762  |      |                      |       | Gf  | G | 34 | no  | tuber   |                                     |
| Asteraceae     | <i>Bellis annua</i>                           | 2816  | 2 | 1408  | 0.77 | Solanum lycopersicum | 1.660 | Tf  | N | 35 |     |         | 37° 4'19.47"N, 31°14'0.62"E         |
| Asteraceae     | <i>Bellis perennis</i>                        | 3090  | 2 | 1545  | 0.81 | Solanum lycopersicum | 1.821 | Hkf | N | 35 |     |         | 49°15'3.437"N, 16°34'25.388"E       |
| Asteraceae     | <i>Bellis sylvestris</i> <sup>*</sup>         | 3991  | 4 | 998   |      |                      |       | Gf  | G | 35 | no  | rhizome |                                     |
| Asteraceae     | <i>Helianthus annuus</i>                      | 5965  | 2 | 2983  | 0.57 | Epipremnum aureum    | 0.763 | Tf  | N | 36 |     |         | Cultivated plants of unknown origin |
| Asteraceae     | <i>Helianthus debilis</i> <sup>+</sup>        | 7156  | 2 | 3578  |      |                      |       | Tf  | N | 36 |     |         |                                     |
| Asteraceae     | <i>Helianthus niveus</i> <sup>+</sup>         | 7139  | 2 | 3570  |      |                      |       | Hkf | N | 36 |     |         |                                     |
| Asteraceae     | <i>Helianthus petiolaris</i> <sup>+</sup>     | 6695  | 2 | 3347  |      |                      |       | Tf  | N | 36 |     |         |                                     |
| Asteraceae     | <i>Helianthus tuberosus</i>                   | 20032 | 6 | 3339  | 0.98 | Epipremnum aureum    | 2.563 | Gf  | G | 36 | no  | tuber   | Botanical garden Masaryk Univ. Brno |
| Asteraceae     | <i>Bidens frondosa</i> <sup>+</sup>           | 3130  | 4 | 783   |      |                      |       | Tf  | N | 37 |     |         |                                     |
| Asteraceae     | <i>Bidens radiata</i>                         | 4216  | 4 | 1054  | 1.96 | Pisum sativum        | 0.538 | Tf  | N | 37 |     |         | 49°11'5.205"N, 14°52'20.117"E       |
| Asteraceae     | <i>Dahlia pinnata</i>                         | 8450  | 8 | 1056  | 2.50 | Ruscus aculeatus     | 0.420 | Gf  | G | 37 | no  | root    | Cultivated plants of unknown origin |
| Asteraceae     | <i>Cosmos atrosanguineus</i> <sup>+</sup>     | 14352 | 4 | 3588  |      |                      |       | Gf  | G | 38 | no  | root    |                                     |
| Asteraceae     | <i>Cosmos bipinnatus</i> <sup>+</sup>         | 3032  | 2 | 1516  |      |                      |       | Tf  | N | 38 |     |         |                                     |
| Asteraceae     | <i>Cosmos sulphureus</i> <sup>+</sup>         | 5868  | 2 | 2934  |      |                      |       | Tf  | N | 38 |     |         |                                     |
| Asteraceae     | <i>Scorzonera austriaca</i>                   | 9958  | 2 | 4979  | 0.78 | Epipremnum aureum    | 1.274 | Hkf | N | 39 |     |         | 49°10'51.897"N, 16°43'43.260"E      |
| Asteraceae     | <i>Scorzonera mollis</i> <sup>*</sup>         | 4810  | 2 | 2405  |      |                      |       | Gf  | G | 39 | no  | tuber   |                                     |
| Araceae        | <i>Arisaema flavum</i> <sup>*</sup>           | 9919  | 4 | 2480  |      |                      |       | Gf  | G | 40 | no  | tuber   |                                     |
| Araceae        | <i>Pistia stratiotes</i> <sup>+</sup>         | 568   | 2 | 284   |      |                      |       | Hf  | N | 40 |     |         |                                     |
| Araceae        | <i>Homalomena rubescens</i> <sup>+</sup>      | 17873 | 2 | 8937  |      |                      |       | Gf  | G | 41 | no  | tuber   |                                     |
| Araceae        | <i>Philodendron erubescens</i> <sup>+</sup>   | 10328 | 2 | 5164  |      |                      |       | Hkf | N | 41 |     |         |                                     |
| Araceae        | <i>Philodendron pinnatifidum</i> <sup>+</sup> | 4773  | 2 | 2387  |      |                      |       | Hkf | N | 41 |     |         |                                     |
| Araceae        | <i>Philodendron squamiferum</i> <sup>+</sup>  | 9095  | 2 | 4548  |      |                      |       | Hkf | N | 41 |     |         |                                     |

|               |                                  |       |   |       |      |                      |       |     |   |    |    |         |                                     |
|---------------|----------------------------------|-------|---|-------|------|----------------------|-------|-----|---|----|----|---------|-------------------------------------|
| Juncaginaceae | <i>Triglochin bulbosa</i> *      | 3453  | 4 | 863   |      |                      |       | Gf  | G | 42 | no | bulb    |                                     |
| Juncaginaceae | <i>Triglochin maritima</i>       | 2360  | 4 | 590   | 2.95 | Pisum sativum        | 0.301 | Hkf | N | 42 |    |         | Cultivated plants of unknown origin |
| Nartheciaceae | <i>Narthecium ossifragum</i> *   | 807   | 2 | 404   |      |                      |       | Gf  | G | 43 | no | rhizome |                                     |
| Nartheciaceae | <i>Narthecium reverchonii</i>    | 716   | 2 | 358   | 0.59 | Solanum lycopersicum | 0.422 | Hkf | N | 43 |    |         | Praha-Trója Botanical Garden        |
| Asparagaceae  | <i>Ruscus aculeatus</i> *        | 20137 | 2 | 10069 |      |                      |       | Gf  | G | 44 | no | rhizome |                                     |
| Asparagaceae  | <i>Ruscus hypoglossum</i> *      | 15854 | 2 | 7927  |      |                      |       | Gf  | G | 44 | no | rhizome |                                     |
| Asparagaceae  | <i>Ruscus hypophyllum</i> *      | 16475 | 2 | 8238  |      |                      |       | Gf  | G | 44 |    | rhizome |                                     |
| Asparagaceae  | <i>Semele androgyna</i> *        | 11842 | 2 | 5921  |      |                      |       | Ff  | N | 44 |    |         |                                     |
| Asphodelaceae | <i>Asphodelus albus</i> *        | 7091  | 2 | 3546  |      |                      |       | Gf  | G | 45 | no | root    |                                     |
| Asphodelaceae | <i>Asphodelus fistulosus</i>     | 4905  | 2 | 2452  | 1.61 | Epipremnum aureum    | 0.628 | Hkf | N | 45 |    |         | 40°32.983'N, 14°54.503'E            |
| Asphodelaceae | <i>Asphodelus microcarpus</i> *  | 6553  | 2 | 3277  |      |                      |       | Gf  | G | 45 | no | root    |                                     |
| Poaceae       | <i>Arrhenatherum elatius</i>     | 13897 | 4 | 3474  | 0.71 | Epipremnum aureum    | 1.778 | Hkf | N | 46 |    |         | 49°15'3.181"N, 16°34'25.763"E       |
| Poaceae       | <i>Arrhenatherum palaestinum</i> | 8601  | 2 | 4301  | 7.83 | Bellis perennis      | 2.784 | Gf  | G | 46 | no | bulb    | 37°39'6.607"N, 31°57'32.908"E       |
| Poaceae       | <i>Hordeum bulbosum</i>          | 15232 | 4 | 3808  |      | Epipremnum aureum    | 1.949 | Gf  | G | 47 | no | bulb    | 36°49'24.223"N, 30°33'5.267"E       |
| Poaceae       | <i>Hordeum vulgare</i> *         | 9780  | 2 | 4890  |      |                      |       | Tf  | N | 47 |    |         |                                     |

**Species** Data marked with plus (+) were adopted from C-value database (Bennett and Leitch, 2012); data marked with asterisk (\*) were adopted from the publication Veselý et al. (2012); for details on used standards and sample origin see supplementary data for that paper

**CV genome size [%]** coefficient of variation for genome size estimation

**Used standard** for newly measured species; standard used for flow cytometric measurements. For more detail see Table 1.

**Ratio** for newly measured species; ratio sample/standard

**Ephemeroid** for geophytes; if species has ephemeroid phenology

**Storage organ** for geophytes; the type of subterranean storage organ (tuber, bulb, thick rhizome, tuberous root)

**Life-form** Gf-geophyte, Hkf-hemicryptophyte, Tf-therophyte, Ff-phanerophyte, Chf-chmaephyte, Hf-hydrophyte

**G/N** G for geophyte, N for non-geophyte
